# Supplementary material for: High grafting density of cyclodextrin polymer for fast removal of aromatic compounds from water
Source: Royal Society of Chemistry journal article supplement (doi:10.1039/c5ra05917h), 2015-01-01
Supplement: c5ra05917h1.pdf [file c5ra05917h1.pdf]

Supporting information

**High grafting density side-group cyclodextrin polymer for fast removal of aromatic compounds from water**

Qian Ma, Xiaoyan Yuan, Yunhui Zhao, Lixia Ren \*

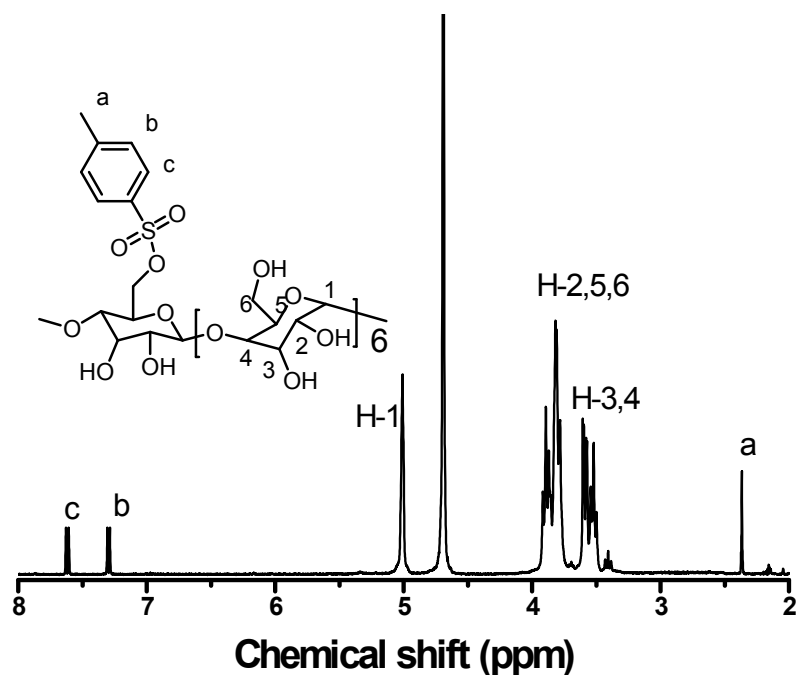

**Fig. S1.**  $^1\text{H}$  NMR spectrum of 6-mono-TsCD.

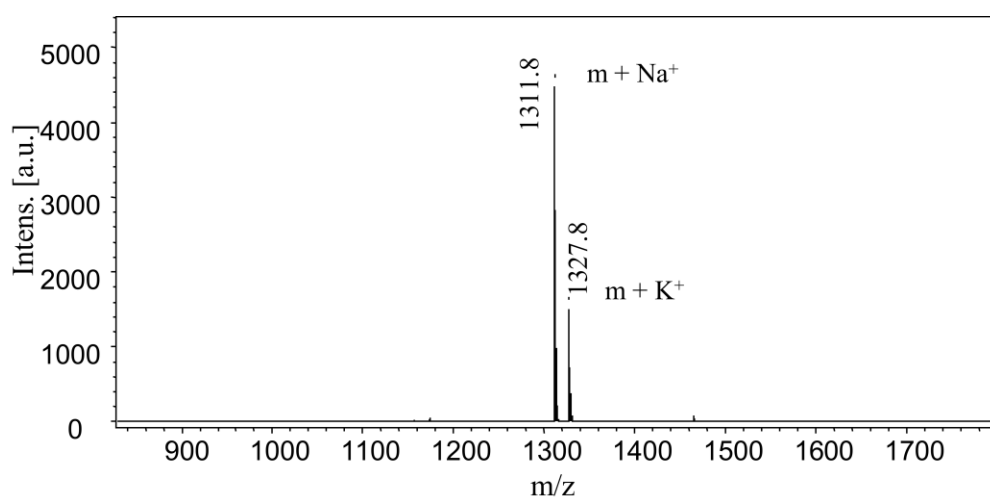

**Fig. S2.** MALDI-TOF MS of 6-mono-TsCD.

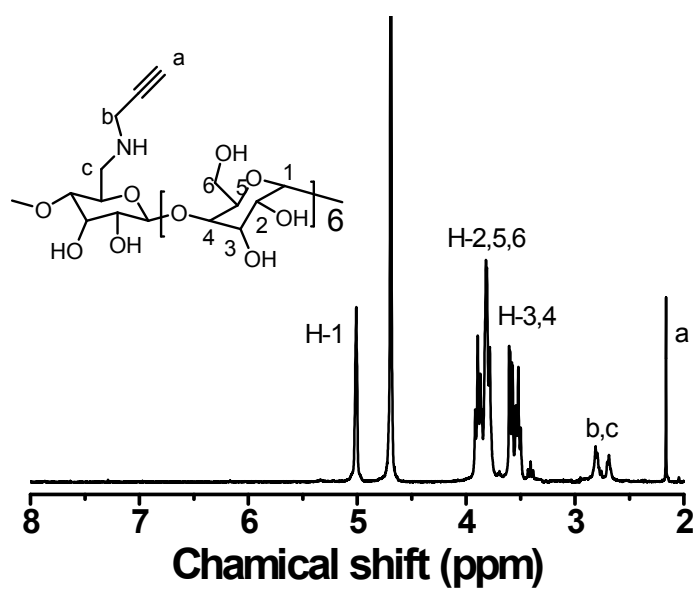

**Fig. S3.**  $^1\text{H}$  NMR spectrum of 6-mono-alkyne-CD.

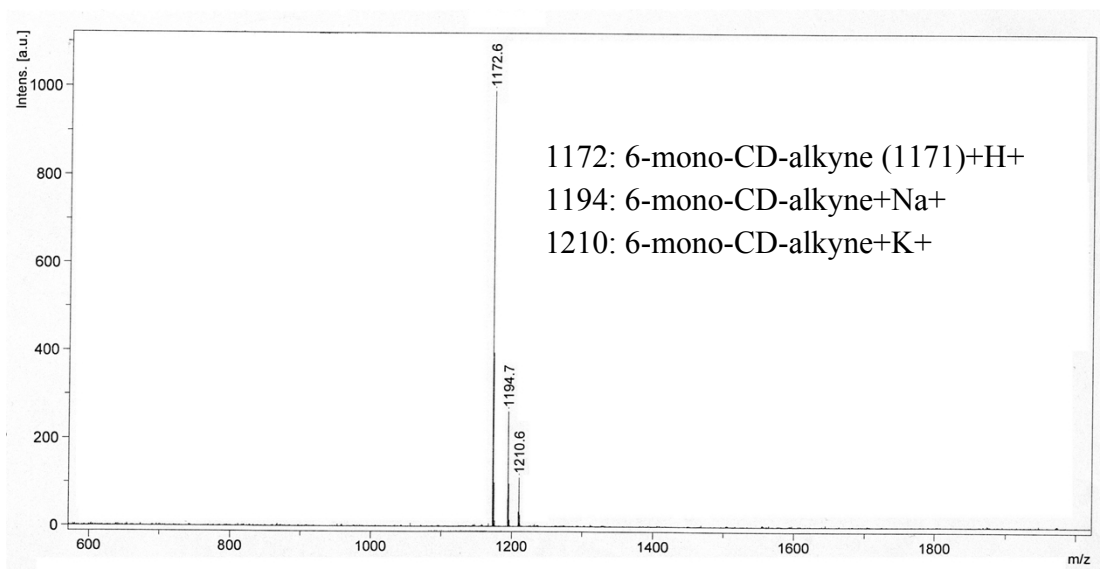

**Fig. S4.** MALDI-TOF MS of 6-mono-alkyne-CD.
